# Supplementary material
Source: ML conference proceedings conference paper supplement (https://openreview.net/forum?id=zz61V8bIab)
Supplement: supplementary_material [file attachment]

The Implementation of "Stochastic Adversarial Network for Multi-Domain Text Classification" in Pytorch

## Datasets

We used the same benchmarks as used in Conditional Adversarial Networks for Multi-Domain Text Classification.The datasets can be found at <https://github.com/YuanWu3/Conditional-Adversarial-Networks-for-Multi-Domain-Text-Classification/tree/main/data>

Put the dataset into the corresponding folder: fdu-mtl、prep-amazon and w2v.

## Requirements:

- Python 3.6
- Pytorch 1.10
- Torchnet
- Scipy
- Tqdm

##Initialization:

To obtain the initial model, run the corresponding code and put it into the folder "./save/init_model":

### Experiment 1: MDTC on the multi-domain Amazon dataset

```bash

cd code/

python exp1_init.py --dataset prep-amazon --model mlp

```

### Experiment 2: Multi-Source Domain Adaptation

```bash

cd code/

# target domain: books

python exp2_init.py --dataset prep-amazon --model mlp --no_wgan_trick --domains dvd electronics kitchen --unlabeled_domains books --dev_domains books

# target domain: dvd

python exp2_init.py --dataset prep-amazon --model mlp --no_wgan_trick --domains books electronics kitchen --unlabeled_domains dvd --dev_domains dvd

# target domain: electronics

python exp2_init.py --dataset prep-amazon --model mlp --no_wgan_trick --domains books dvd kitchen --unlabeled_domains electronics --dev_domains electronics

# target domain: kitchen

python exp2_init.py --dataset prep-amazon --model mlp --no_wgan_trick --domains dvd electronics kitchen --unlabeled_domains kitchen --dev_domains kitchen

### Experiment 3: MDTC on the FDU-MTL dataset

```bash

cd code/

python exp3_init.py --dataset fdu-mtl --model cnn --max_epoch 30

```

## Training

All the parameters are set as mentioned in the paper. You can use the following commands to the tasks:

### Experiment 1: MDTC on the multi-domain Amazon dataset

```bash

cd code/

python exp1_with_pseu_label.py --dataset prep-amazon --model mlp

```

### Experiment 2: Multi-Source Domain Adaptation

```bash

cd code/

# target domain: books

python exp2_with_pseu_label.py --dataset prep-amazon --model mlp --no_wgan_trick --domains dvd electronics kitchen --unlabeled_domains books --dev_domains books

# target domain: dvd

python exp2_with_pseu_label.py --dataset prep-amazon --model mlp --no_wgan_trick --domains books electronics kitchen --unlabeled_domains dvd --dev_domains dvd

# target domain: electronics

python exp2_with_pseu_label.py --dataset prep-amazon --model mlp --no_wgan_trick --domains books dvd kitchen --unlabeled_domains electronics --dev_domains electronics

# target domain: kitchen

python exp2_with_pseu_label.py --dataset prep-amazon --model mlp --no_wgan_trick --domains dvd electronics kitchen --unlabeled_domains kitchen --dev_domains kitchen

### Experiment 3: MDTC on the FDU-MTL dataset

```bash

cd code/

python exp3_with_pseu_label.py --dataset fdu-mtl --model cnn --max_epoch 30

```
